# Supplementary material for: c-di-GMP Turn-Over in Clostridium difficile Is Controlled by a Plethora of Diguanylate Cyclases and Phosphodiesterases
Source: PLOS journal article supplement (doi:10.1371/journal.pgen.1002039), 2011-03-31
Supplement: S4 (10.1371/journal.pgen.1002039.s004) [file journal.pgen.1002039.s004]

Table S1. Predicted and observed activities of the 31 most conserved putative c-di-GMP turn-over proteins.

| **Protein name** | **GGDEF motif** | **EAL motif** | **Predicted activity** | **Observed activity***a* | |
| --- | --- | --- | --- | --- | --- |
| **Motility** | **Biofilm** |
| CD0537 | GGEEF | - | DGC | + | 0 |
| CD0707 | GGDEF | - | DGC | -- | + |
| CD0997 | GGDEF | - | DGC | -- | 0 |
| CD1015 | GGDEF | - | DGC | -- | ++ |
| CD1028 | **QK**D**M**I | - | none | 0 | 0 |
| CD1185 | GGEEF | - | DGC | -- | ++ |
| CD1419 | GGDEF | - | DGC | - | + |
| CD1420 | GGDEF | - | DGC | -- | ++ |
| CD1841 | GGDEF | - | DGC | -- | 0 |
| CD2244 | GGEEF | - | DGC | -- | 0 |
| CD2384 | GGEE**I** | - | none | 0 | 0 |
| CD2385 | GGEEF | - | DGC | 0 | 0 |
| CD2887 | GGEE**Y** | - | none | 0 | ++ |
| CD3365 | GGDEF | - | DGC | 0 | 0 |
| CD0204 | **DA**D**L**F | ESLxR | PDEA | 0 | - |
| CD0522 | GGDEF  **YA**D**V**F | EALxR | DGC/PDEA | 0*b* | 0*b* |
| CD0748 | **S**GEEF | EALxR | PDEA | 0 | 0 |
| CD0757 | **D**GDEF | EVLxR | PDEA | ++ | 0 |
| CD0811 | GGD**I**F | EALxR | PDEA | 0 | 0 |
| CD1421 | **K**GE**G**F | EALxR | PDEA | 0 | - |
| CD1515 | **D**GDE**M** | EVLxR | PDEA | ++ | - |
| CD1538 | **DN**D**H**F | EALxR | PDEA | 0 | - |
| CD1616 | **SA**D**N**F | EALxR | PDEA | ++ | 0 |
| CD1651 | **IA**D**R**F | EALxR | PDEA | + | 0 |
| CD1840 | **SA**D**N**F | EALxR | PDEA | + | 0 |
| CD2134 | G**S**D**N**F | EALxR | PDEA | - | -- |
| CD2663 | **SN**D**N**F | EALxR | PDEA | ++ | - |
| CD2760 | **KS**D**V**F | EALxR | PDEA | + | 0 |
| CD2873 | **SN**D**G**F | EALxR | PDEA | 0 | 0 |
| CD2965 | **SS**D**Y**F | EALxR | PDEA | 0 | 0 |
| CD3650 | - | EGLxR | PDEA | 0 | 0 |

*a* Observed activity upon over-expression in *V. cholerae* N16961. + indicates an increase, 0 indicates no significant variation and - indicates a decrease.

*b* Activity observed for the complete wild-type protein
