# Supplementary material for: c-di-GMP Turn-Over in Clostridium difficile Is Controlled by a Plethora of Diguanylate Cyclases and Phosphodiesterases
Source: PLOS journal article supplement (doi:10.1371/journal.pgen.1002039), 2011-03-31
Supplement: S5 (10.1371/journal.pgen.1002039.s005) [file journal.pgen.1002039.s005]

Table S2. Accession numbers of genomes of *C*. *difficile* strains used in this study

| Strain | Sequence | Accession # |
| --- | --- | --- |
| 630 | complete genome | NC_009089 |
| 630 | pCD630 | NC_008226 |
| CD6 | pCD6 | NC_005326 |
| ATCC 43255 | whole genome shotgun sequence | NZ_ABKJ00000000 |
| CD196 | complete genome | NC_013315 |
| CIP 107932 | whole genome shotgun sequence | NZ_ABKK00000000 |
| NAP07 | whole genome shotgun sequence | NZ_ADVM00000000 |
| NAP08 | whole genome shotgun sequence | NZ_ADNX00000000 |
| QCD-23m63 | whole genome shotgun sequence | NZ_ABKL00000000 |
| QCD-32g58 | whole genome shotgun sequence | NZ_AAML00000000 |
| QCD-37x79 | whole genome shotgun sequence | NZ_ABHG00000000 |
| QCD-63q42 | whole genome shotgun sequence | NZ_ABHD00000000 |
| QCD-66c26 | whole genome shotgun sequence | NZ_ABFD00000000 |
| QCD-76w55 | whole genome shotgun sequence | NZ_ABHE00000000 |
| QCD-97b34 | whole genome shotgun sequence | NZ_ABHF00000000 |
| R20291 | complete genome | NC_013316 |
| 2007855 | complete genome | FN665654*a* |
| BI1 | complete genome | FN668941*a* |
| BI1 | Plasmid pCDBI1 | FN668942 *a* |
| BI1 | BI1 putative phage or plasmid | FN668943*a* |
| BI9 | complete genome | FN668944*a* |
| CF5 | complete genome | FN665652*a* |
| M68 | complete genome | FN668375*a* |
| M120 | complete genome | FN665653*a* |

*a*Gene annotation of these genomes was not available at the time of our analysis.
